# Supplementary material
Source: PubMed Central journal article supplement (PMC3131040)
Supplement: supp_ddr198_ddr198supp_figs.pdf [file supp_ddr198_ddr198supp_figs.pdf]

# Supplemental Figure 1

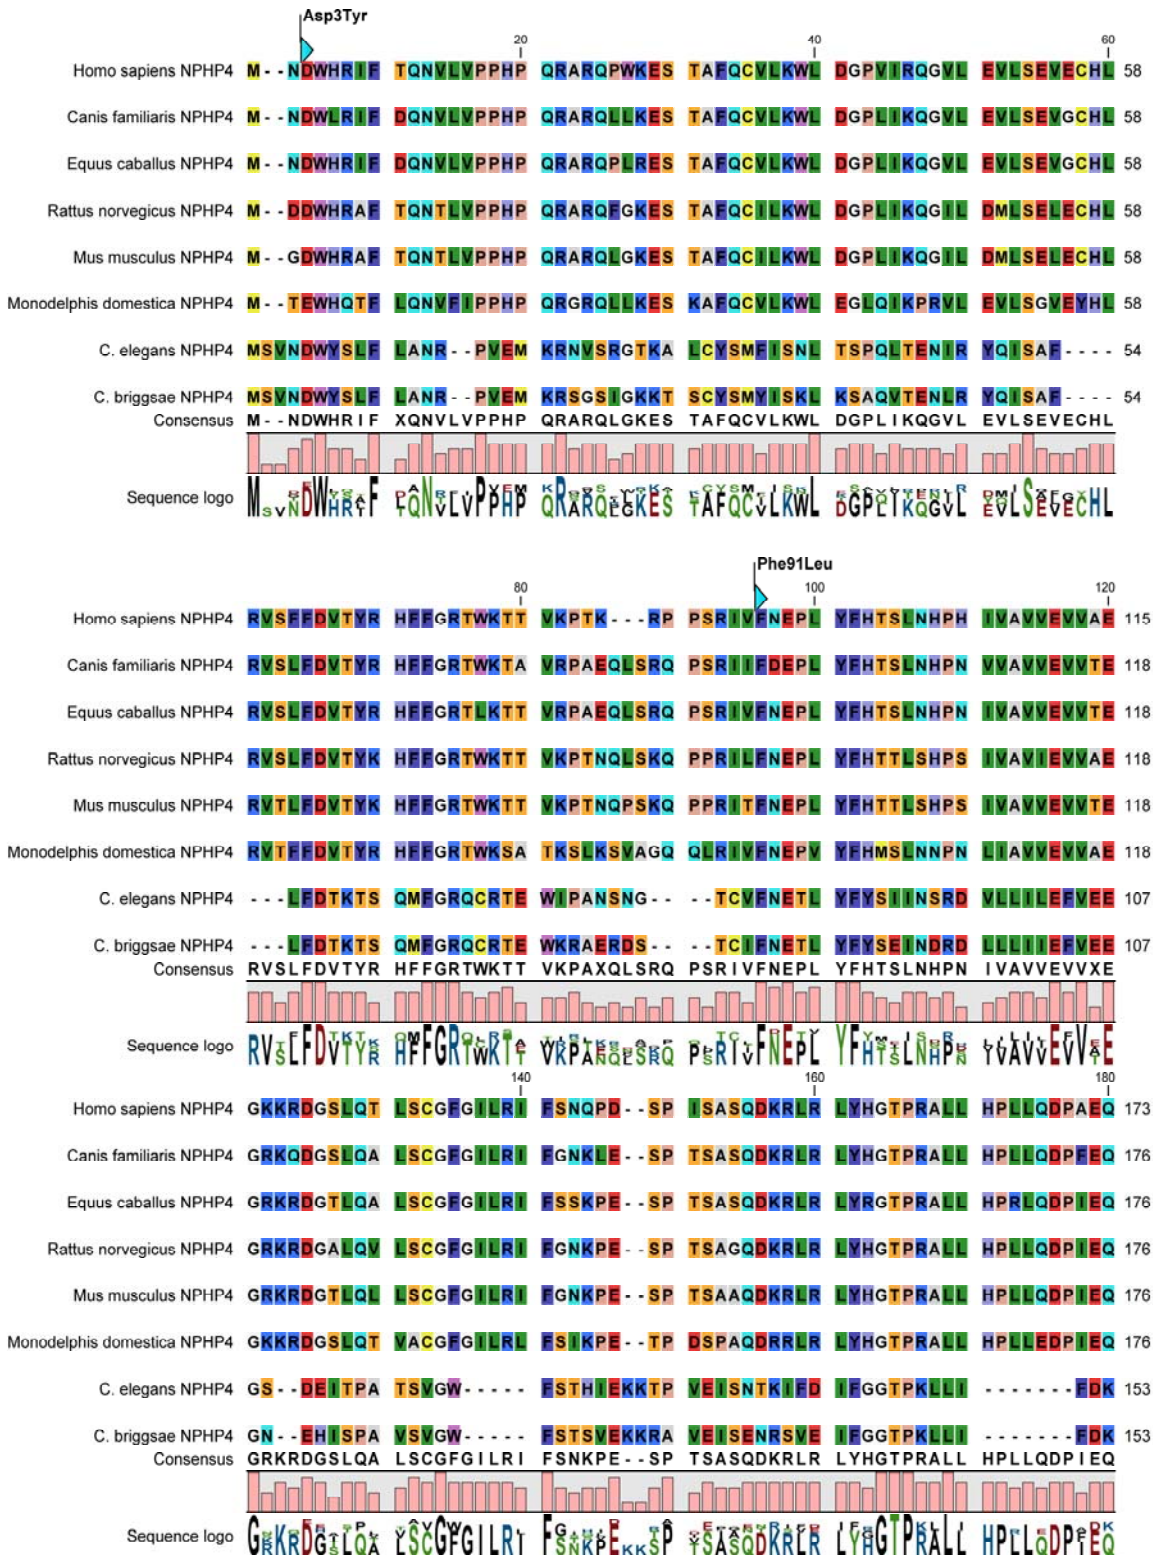







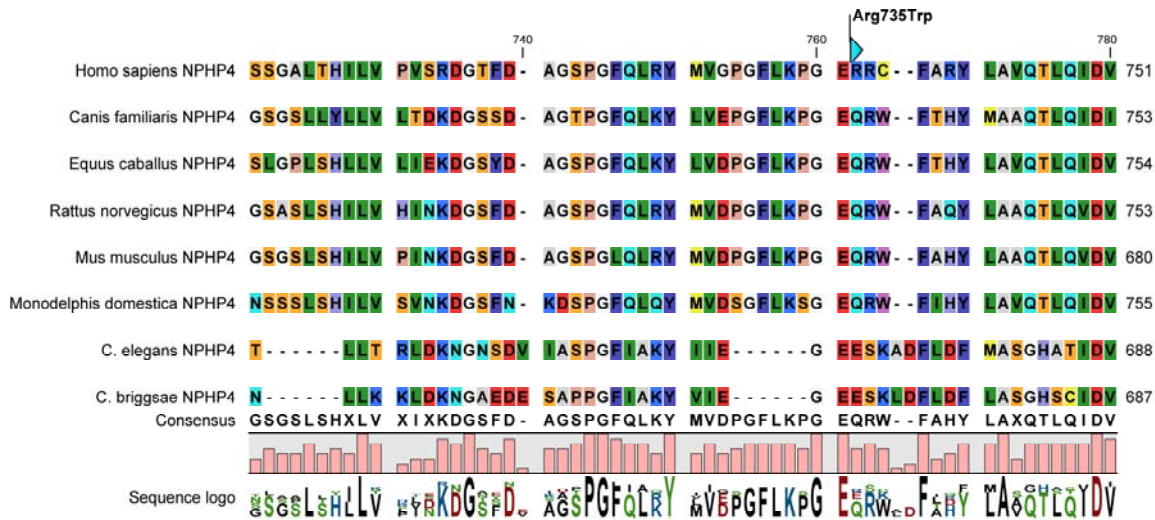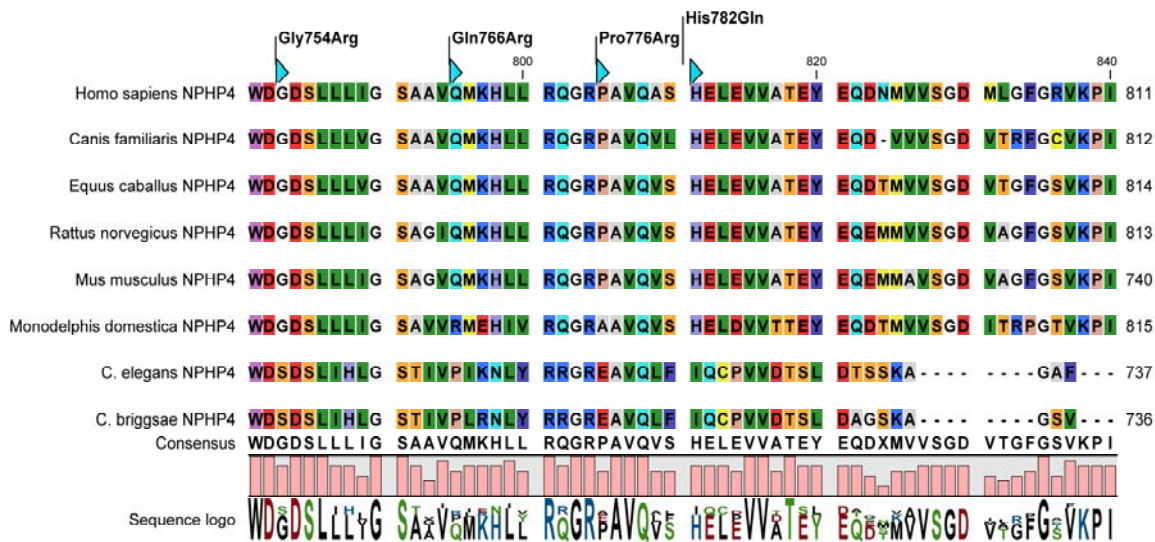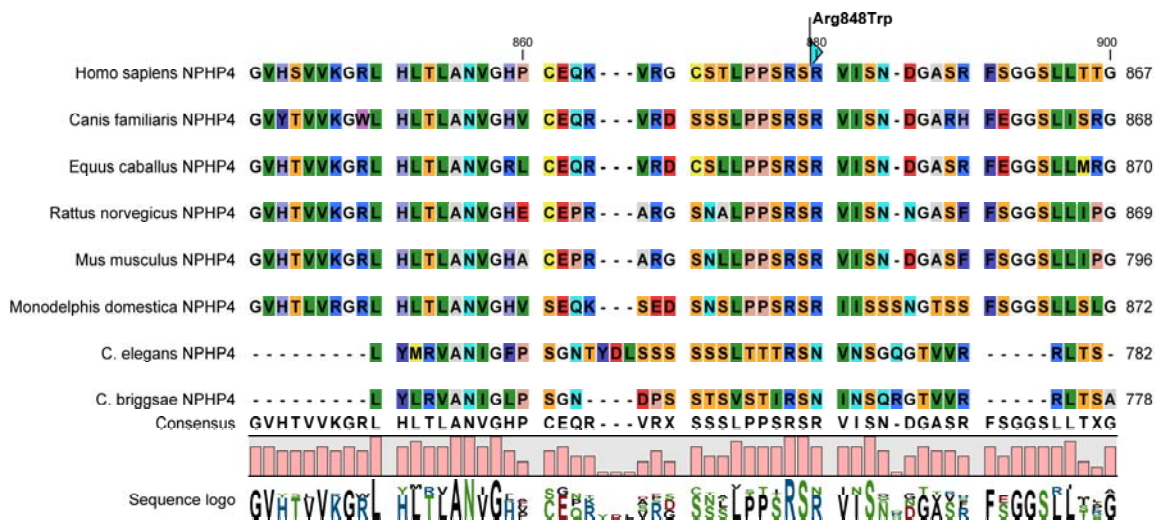

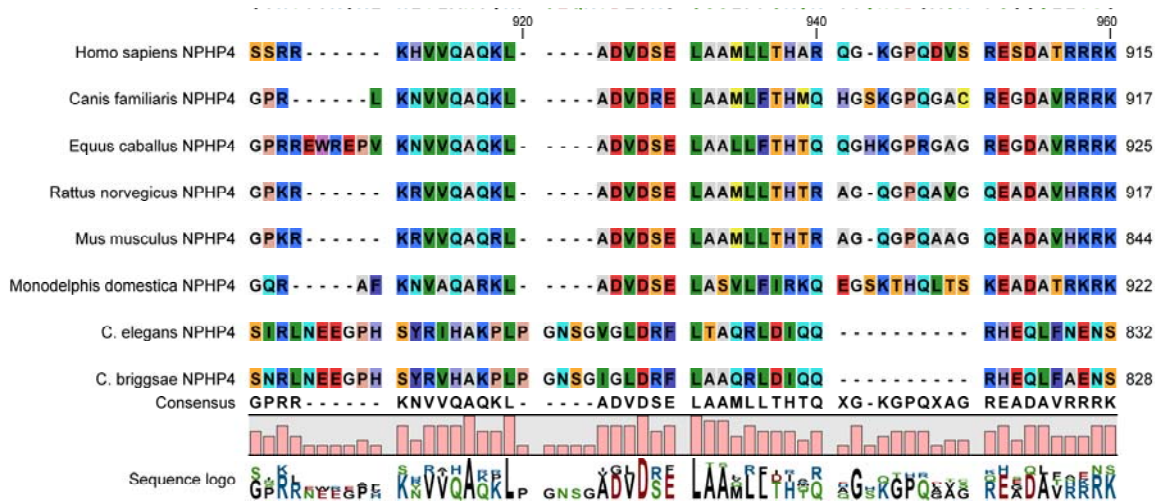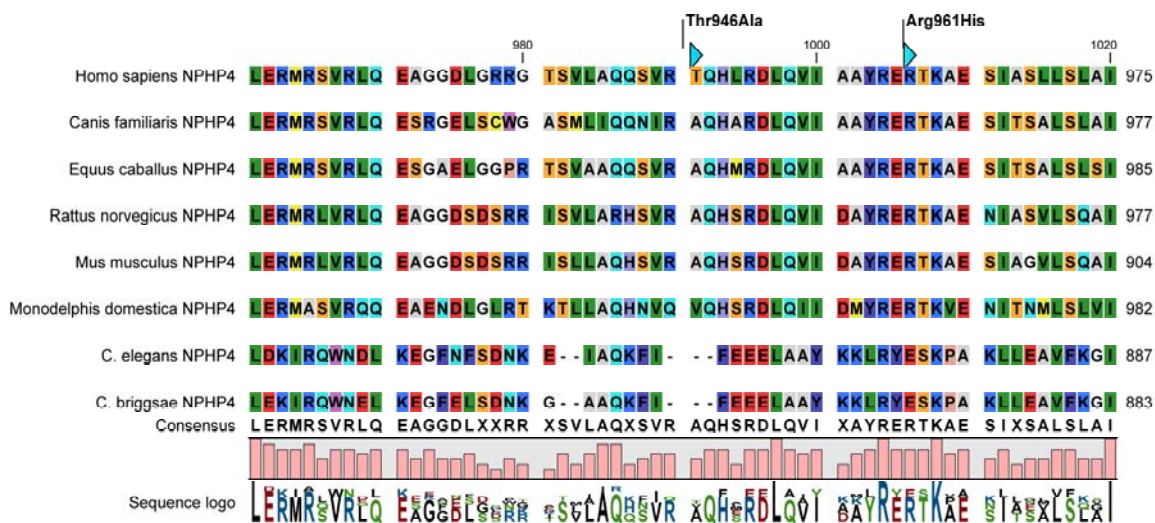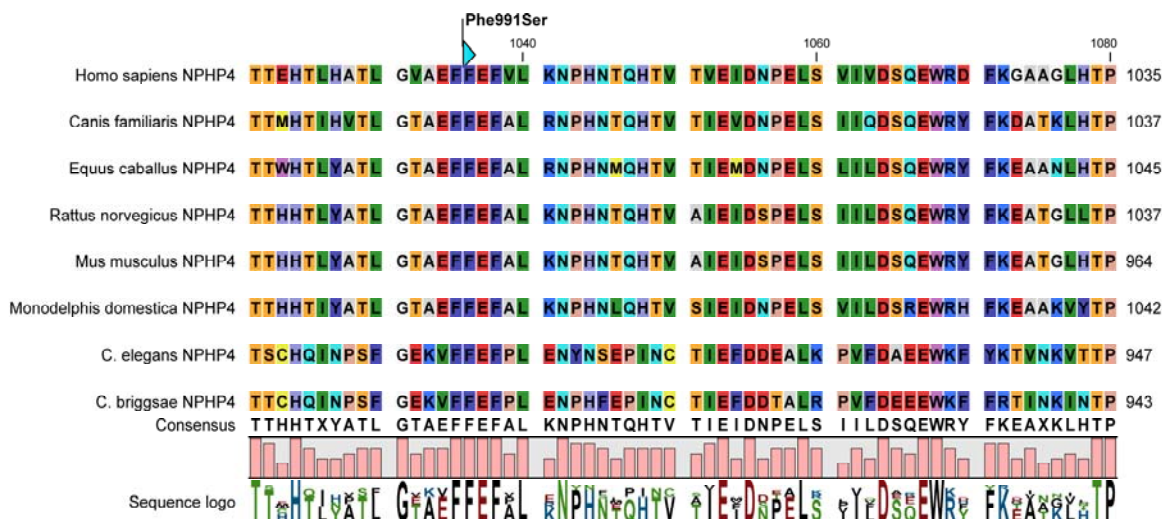

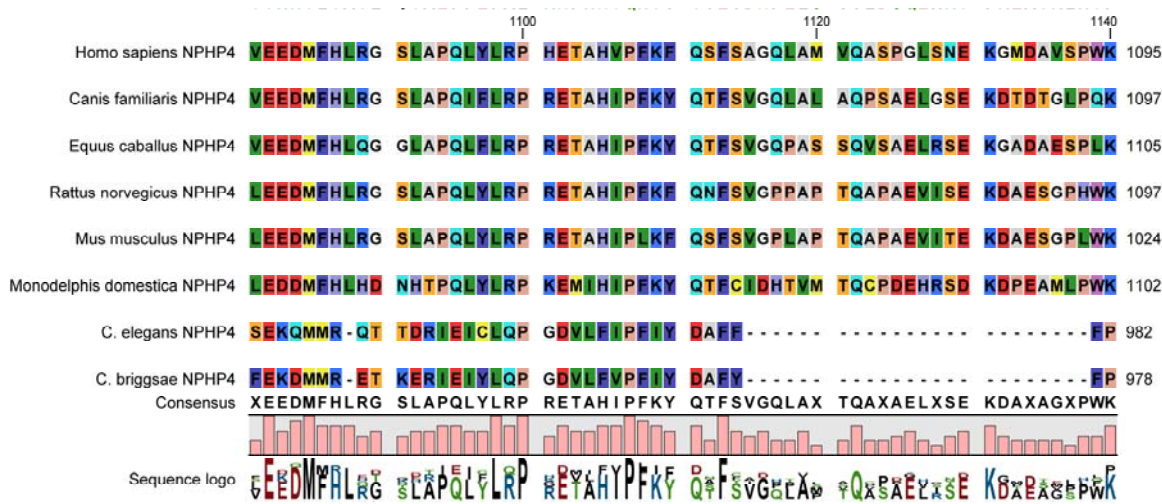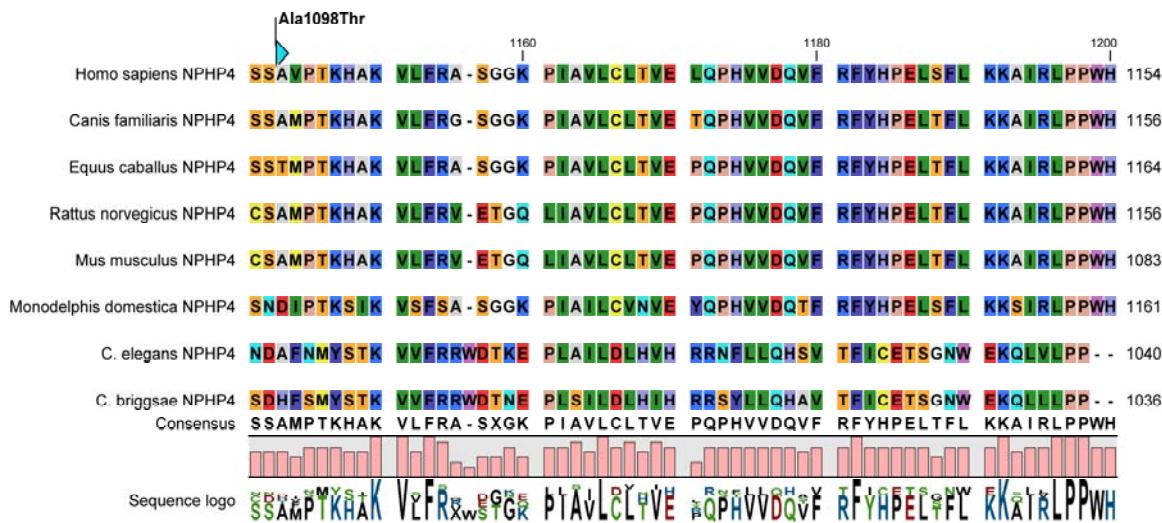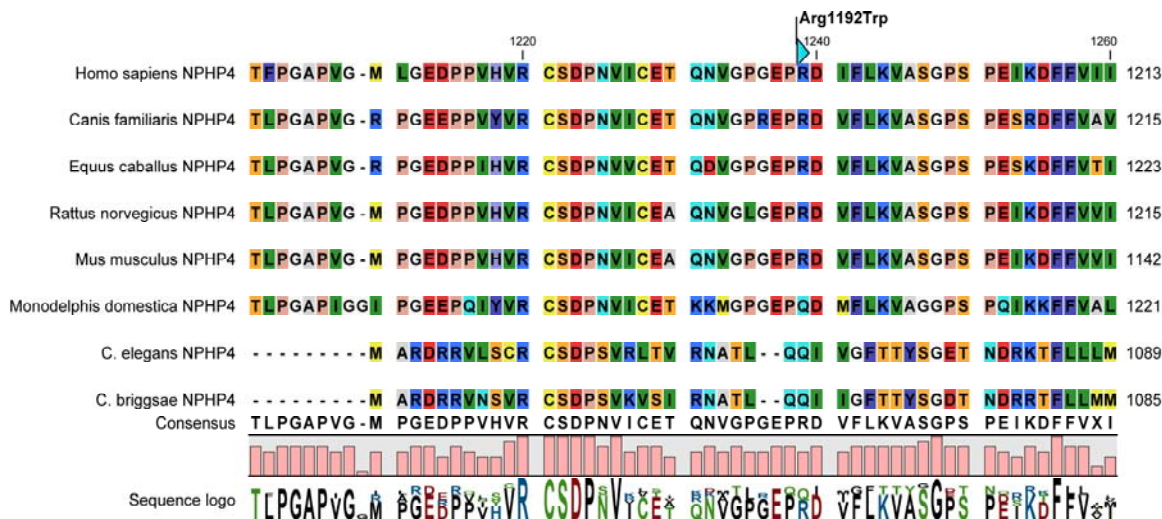

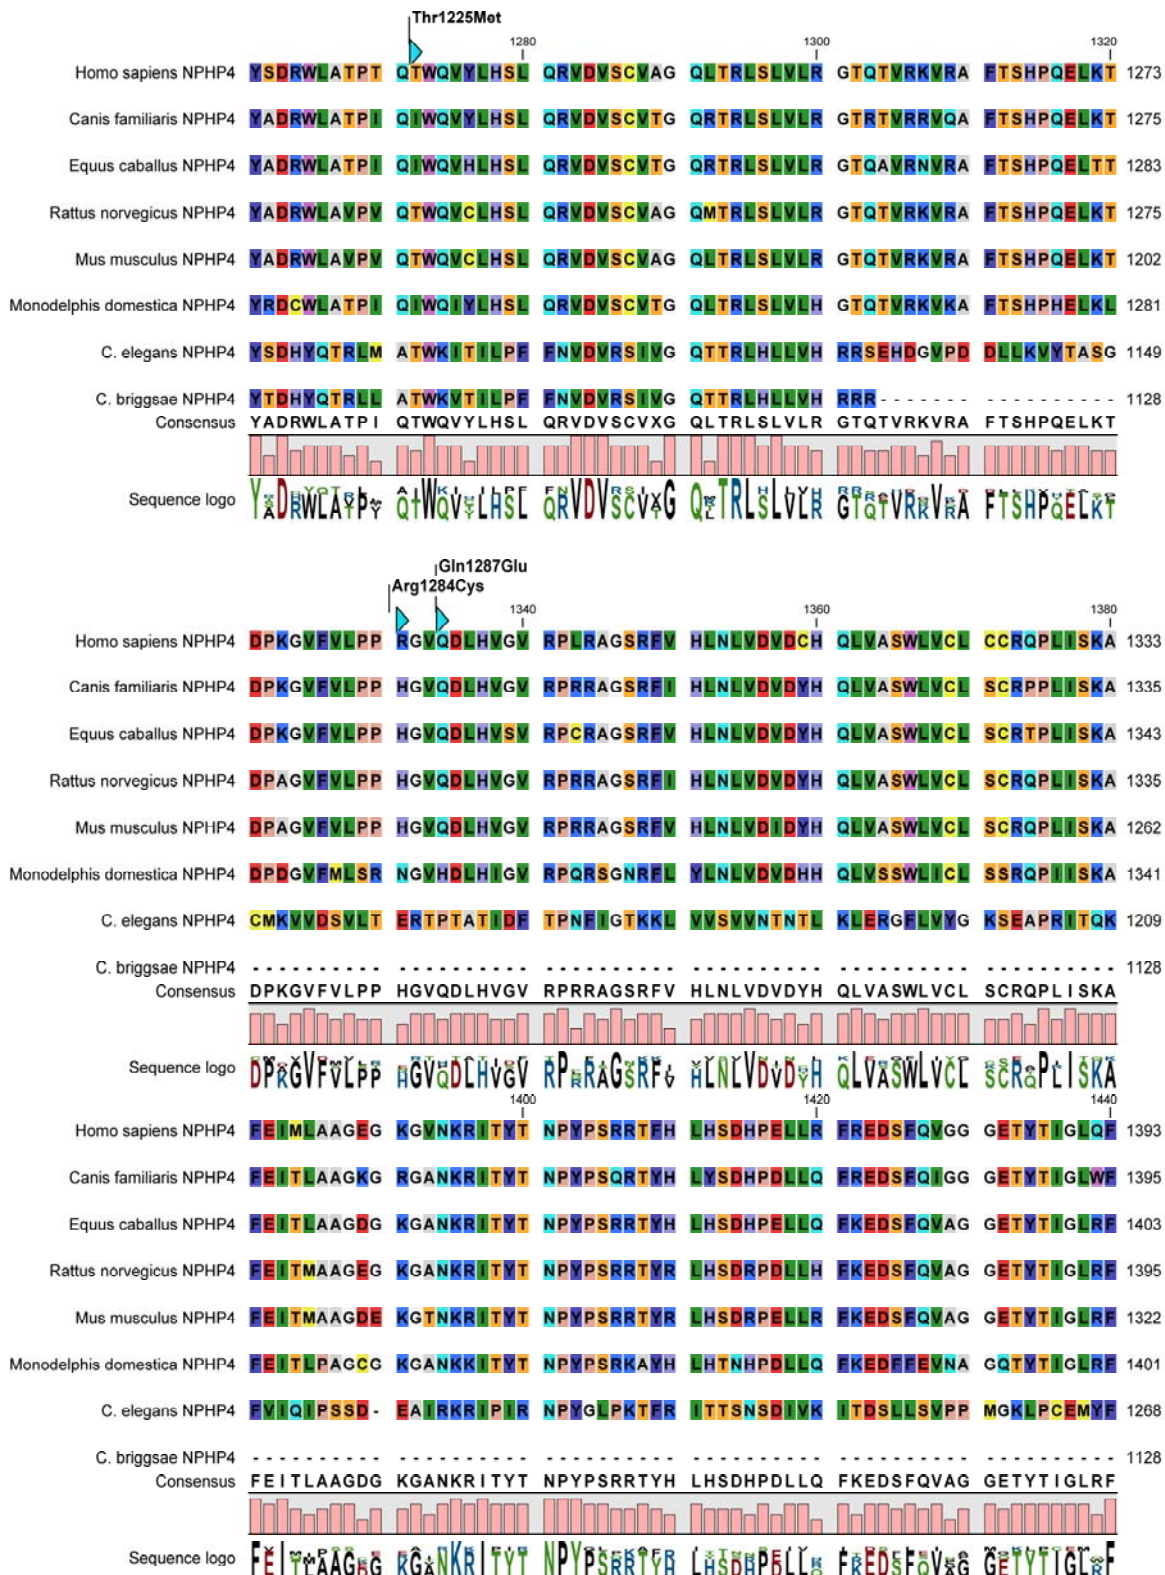





# Supplemental Figure 2

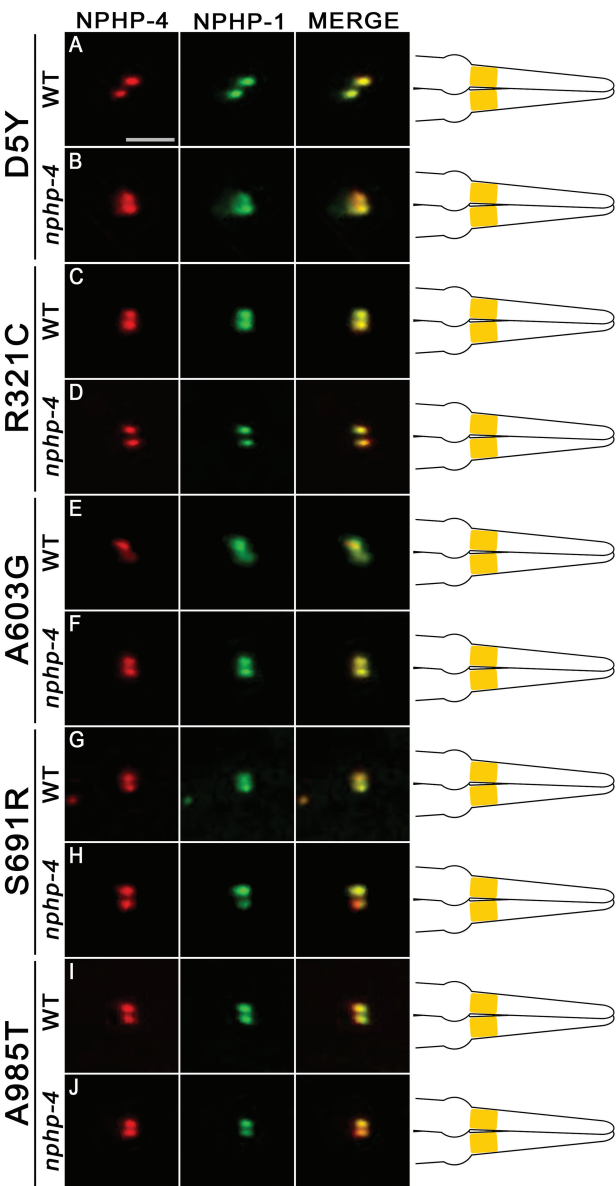

# Supplemental Figure 3

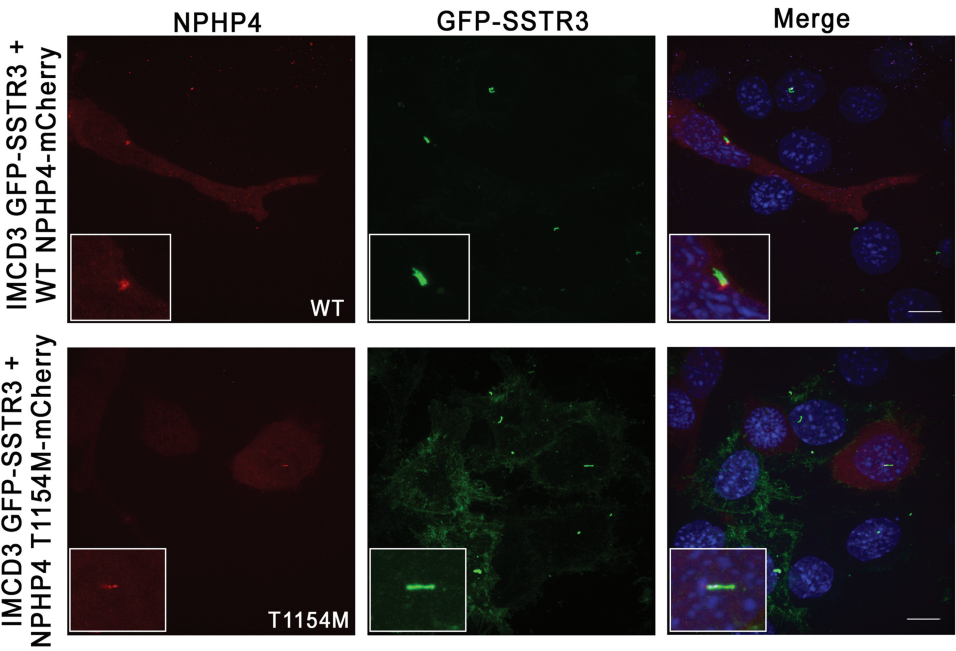

# Supplemental Figure 4

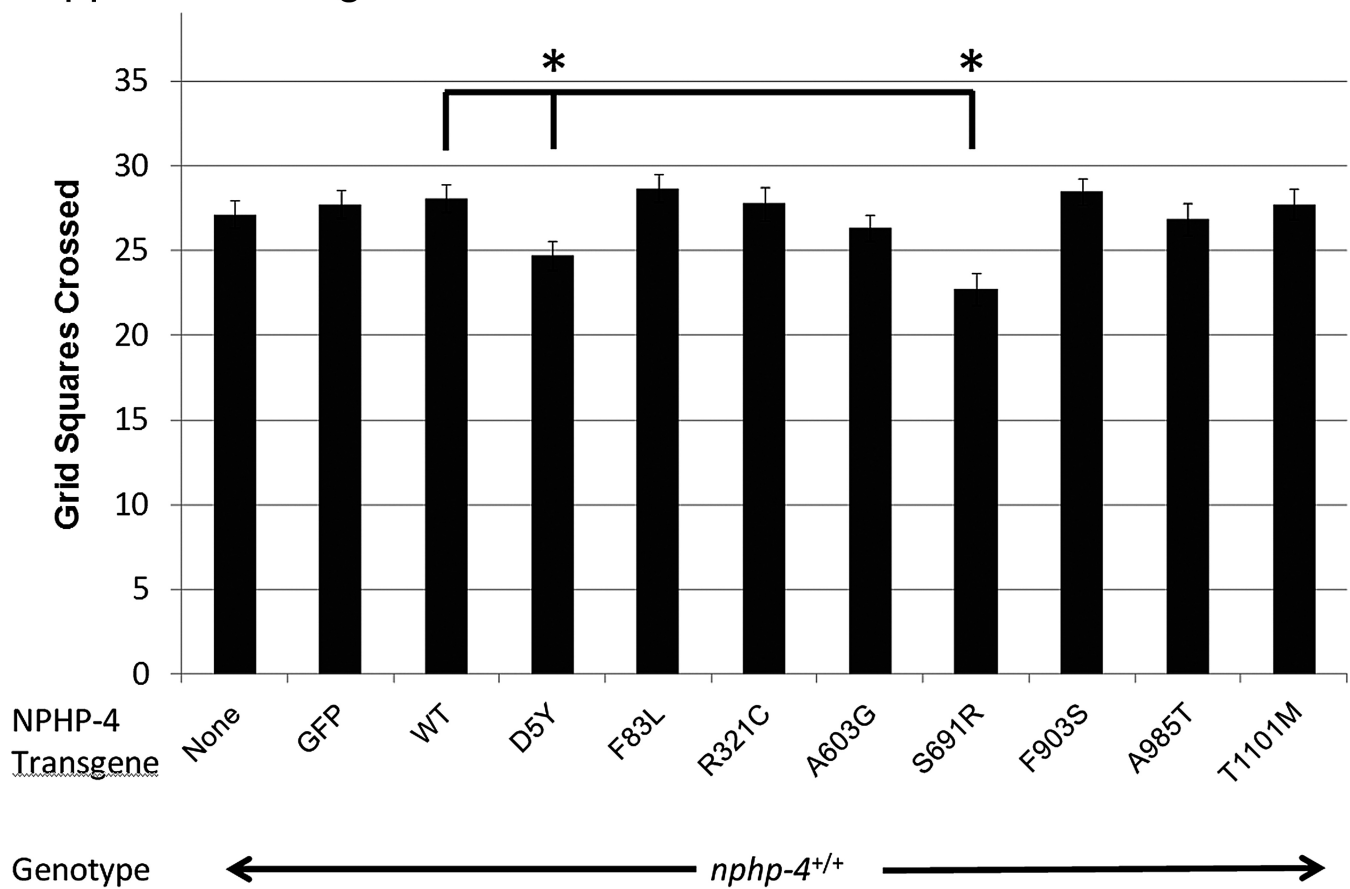

## Supplemental Figure 5

| NPHP-4<br>Transgene | Genotype  | Head    |     | Tail    |     | p Head | p Tail |
|---------------------|-----------|---------|-----|---------|-----|--------|--------|
|                     |           | non Dyf | Dyf | non Dyf | Dyf |        |        |
| <b>WT</b>           | <i>wt</i> | 100     | 0   | 97      | 3   | -      | -      |
| <b>None</b>         | <i>wt</i> | 100     | 0   | 100     | 0   |        |        |
| <b>D5Y</b>          | <i>wt</i> | 100     | 0   | 98      | 2   |        |        |
| <b>F83L</b>         | <i>wt</i> | 100     | 0   | 96      | 4   |        |        |
| <b>R321C</b>        | <i>wt</i> | 100     | 0   | 97      | 3   |        |        |
| <b>A603G</b>        | <i>wt</i> | 100     | 0   | 98      | 2   |        |        |
| <b>S691R</b>        | <i>wt</i> | 100     | 0   | 99      | 1   |        |        |
| <b>F903S</b>        | <i>wt</i> | 100     | 0   | 98      | 2   |        |        |
| <b>A985T</b>        | <i>wt</i> | 100     | 0   | 98      | 2   |        |        |
| <b>T1101M</b>       | <i>wt</i> | 100     | 0   | 97      | 3   |        |        |
